# Supplementary material for: Psychological and social consequences of non-invasive prenatal testing (NIPT): a scoping review
Source: Springer Nature journal article supplement (doi:10.1186/s12884-019-2518-x), 2019-10-28
Supplement: MOESM1 [file 17319478]

## Appendix 1: Search strategies

### Medline (Ovid)

Database(s): Ovid MEDLINE(R) 1946 to July Week 4 2018, Ovid MEDLINE(R) Daily Update August 07, 2018, Ovid MEDLINE(R) In-Process & Other Non-Indexed Citations August 07, 2018, Ovid MEDLINE(R) Epub Ahead of Print August 07, 2018

| ID | Query                                                                                                | Results |
|----|------------------------------------------------------------------------------------------------------|---------|
| 1  | MOTHERS/                                                                                             | 37574   |
| 2  | FATHERS/                                                                                             | 7993    |
| 3  | Pregnant Women/                                                                                      | 6829    |
| 4  | pregnan*.ti,ab,kf.                                                                                   | 476435  |
| 5  | mother*.ti,ab,kf.                                                                                    | 196883  |
| 6  | matern*.ti,ab,kf.                                                                                    | 249847  |
| 7  | father*.ti,ab,kf.                                                                                    | 37635   |
| 8  | parent*.ti,ab,kf.                                                                                    | 376695  |
| 9  | wom?n.ti,ab,kf.                                                                                      | 1031570 |
| 10 | m?n.ti,ab,kf.                                                                                        | 1391484 |
| 11 | couple*.ti,ab,kf.                                                                                    | 319617  |
| 12 | or/1-11                                                                                              | 3200741 |
| 13 | Prenatal Diagnosis/                                                                                  | 34959   |
| 14 | Genetic Testing/                                                                                     | 33358   |
| 15 | ((prenatal or aneuploid*) adj3 (screen* or diagnos* or test*)).ti,ab,kf.                             | 31245   |
| 16 | ((non-invasive or noninvasive) adj5 (prenatal test* or prenatal diagnos* or genom* based)).ti,ab,kf. | 1577    |
| 17 | (gNIPT or NIPT).ti,ab,kf.                                                                            | 534     |
| 18 | or/13-17                                                                                             | 82254   |
| 19 | exp Maternal Behavior/                                                                               | 11484   |
| 20 | exp Adaptation, Psychological/                                                                       | 118205  |
| 21 | Anxiety/                                                                                             | 70893   |
| 22 | Social Support/                                                                                      | 64160   |
| 23 | Decision Making/                                                                                     | 84443   |
| 24 | (Anxiety or anxious).ti,ab,kf.                                                                       | 168977  |
| 25 | Attitude*.ti,ab,kf.                                                                                  | 132672  |
| 26 | Psycho*.ti,ab,kf.                                                                                    | 600175  |
| 27 | Crisis*.ti,ab,kf.                                                                                    | 43844   |
| 28 | Distress*.ti,ab,kf.                                                                                  | 107439  |
| 29 | Trauma*.ti,ab,kf.                                                                                    | 326230  |
| 30 | Stress.ti,ab,kf.                                                                                     | 644084  |
| 31 | Depression.ti,ab,kf.                                                                                 | 296585  |
| 32 | or/19-31                                                                                             | 2123581 |

|    |                                |      |
|----|--------------------------------|------|
| 33 | 12 and 18 and 32               | 4214 |
| 34 | limit 33 to yr="2011 -Current" | 1331 |

### Cochrane Library

Date run: 08/08/2018 08:42:19

| ID  | Query                                                                                                  | Results |
|-----|--------------------------------------------------------------------------------------------------------|---------|
| #1  | MeSH descriptor: [Mothers] this term only                                                              | 1482    |
| #2  | MeSH descriptor: [Fathers] this term only                                                              | 152     |
| #3  | MeSH descriptor: [Pregnant Women] this term only                                                       | 176     |
| #4  | pregnan* or mother* or matern* or father* or parent* or wom?n or m?n or couple*                        | 276821  |
| #5  | #1 or #2 or #3 or #4                                                                                   | 276821  |
| #6  | MeSH descriptor: [Prenatal Diagnosis] this term only                                                   | 169     |
| #7  | MeSH descriptor: [Genetic Testing] this term only                                                      | 361     |
| #8  | (prenatal or aneuploid*) near/3 (screen* or diagnos* or test*)                                         | 943     |
| #9  | (non-invasive or noninvasive) near/5 ((prenatal test*) or (prenatal diagnos*) or (genom* based))       | 1279    |
| #10 | gNIPT or NIPT                                                                                          | 20      |
| #11 | #6 or #7 or #8 or #9 or #10                                                                            | 2507    |
| #12 | MeSH descriptor: [Maternal Behavior] explode all trees                                                 | 276     |
| #13 | MeSH descriptor: [Adaptation, Psychological] explode all trees                                         | 4925    |
| #14 | MeSH descriptor: [Anxiety] this term only                                                              | 6457    |
| #15 | MeSH descriptor: [Social Support] this term only                                                       | 3016    |
| #16 | MeSH descriptor: [Decision Making] this term only                                                      | 1977    |
| #17 | anxiety or anxious or attitude* or psycho* or crisis* or distress* or trauma* or stress* or depression | 227826  |
| #18 | #12 or #13 or #14 or #15 or #16 or #17                                                                 | 229023  |
| #19 | #5 and #11 and #18 with Cochrane Library publication date between Jan 2011 and Aug 2018                | 248     |

### CINAHL

Date run: August 08, 2018 5:54:43 AM

Search modes: Boolean/Phrase

| ID | Query                                                             | Results |
|----|-------------------------------------------------------------------|---------|
| S7 | S1 AND S4 AND S5 (Limits: Published date: 20110101-20181231)      | 400     |
| S6 | S1 AND S4 AND S5                                                  | 1,135   |
| S5 | anxiety or anxious or attitude or psycho* or crisis* or distress* | 711,392 |

|    |                                                                                                  |         |
|----|--------------------------------------------------------------------------------------------------|---------|
|    | or trauma* or stress or depression                                                               |         |
| S4 | S2 or S3                                                                                         | 5,886   |
| S3 | ("non-invasive" or "noninvasive") N5 ("prenatal test*" or "prenatal diagnos*" or "genom* based") | 235     |
| S2 | (prenatal or aneuploid*) N3 (screen* or diagnos* or test*)                                       | 5,886   |
| S1 | pregnan* or mother* or matern* or father* or parent* or wom?n or m?n or couple*                  | 493,384 |

## PsychINFO

Date run: August 08, 2018 6:06:14 AM

Search modes: Boolean/Phrase

| ID | Query                                                                                                | Results   |
|----|------------------------------------------------------------------------------------------------------|-----------|
| S7 | S1 AND S4 AND S5 (Limits: Publication year 2011-2018)                                                | 509       |
| S6 | S1 AND S4 AND S5                                                                                     | 1,393     |
| S5 | anxiety or anxious or attitude or psycho* or crisis* or distress* or trauma* or stress or depression | 3,280,241 |
| S4 | S2 or S3                                                                                             | 2,383     |
| S3 | ("non-invasive" or "noninvasive") N5 ("prenatal test*" or "prenatal diagnos*" or "genom* based")     | 46        |
| S2 | (prenatal or aneuploid*) N3 (screen* or diagnos* or test*)                                           | 2,383     |
| S1 | pregnan* or mother* or matern* or father* or parent* or wom?n or m?n or couple*                      | 824,877   |
